# Supplementary material for: IHF Is Required for the Transcriptional Regulation of the Desulfovibrio vulgaris Hildenborough orp Operons
Source: PLOS journal article supplement (doi:10.1371/journal.pone.0086507), 2014-01-21
Supplement: S1 (10.1371/journal.pone.0086507.s001) [file journal.pone.0086507.s001]

**A. *orp1* promoter region :**

GGCGACACGAAATGACGTAGCCGGTCGACGCCATTCCCCGGCGCACCCCTGCGC  
CCTAACGCCGCCTCTCAGTCCCGACAGACCTGTCTGCGCACCCCCGTGTAGCCA  
GTCTGACCACACCTCGCCGCGCTGGCCTCCATGCCGGTCTCCAAGACCGTTAT  
CCCCTGCCCGACGCCTTGGCGGGCTATCCCTGCCAGCCCGTCTCCCCCTGACAT  
(-----)  
AGGGCGTGTGTTTGGCGCCGACATGGCCACGACAAGGCGCATTTTACGCCCATCA  
(-----)  
CAAGCTCGACGTTCCACGCAAAAAGCAACAACCAATCAGAATAAAAGCATTTCT  
TTTACGGGCATCATTCTGCTTCGGAGTGGTCCGGTACCGGAGGTACGCCACGC  
CATGATCGTCCATGC

└─  
+1

**B. *orp2* promoter region :**

GTTTCGCAGGGGGATGTCTCGGGGCAGGGGCCATATGATCCTCCGTGTGAAAGTCT  
CTATCATGTGGGCGCATTTTGGCGCCGTATTTTCTTGGGCGTGTCATGTGTGTTGG  
(-----)  
GAAAAGATGTTTGATTACGATGTATTGGAGTGTGGGAACGGAACGTGCTTCGTC  
(-----)  
CGTGGCAAACGCTGCATACGCGGGCGGAAGGAGCACATATGCCATACGGAGATG

└─  
+1

**Figure S1: Sequences of *orp1* (A) and *orp2* (B) promoter regions.** The identified  $\sigma^{54}$  promoters of *orp1* and *orp2* are boxed in solid lines. The transcriptional start point of both operons is indicated by bent arrows. The stop codon and the start codon are in italics and underlined, and the shine-Dalgarno are indicated in bold. The two palindromic binding sites of the  $\sigma^{54}$  transcription activator, DVU2106, are boxed in dotted lines. The sequences of the putative IHF-binding sites are in bold and underlined: the *orp1* promoter contains two putative IHF-binding sites and one putative IHF-binding sequence was found in the *orp2* promoter.
